# Supplementary material for: Effect of Ambient Plasma Treatments on Thermal Conductivity and Fracture Toughness of Boron Nitride Nanosheets/Epoxy Nanocomposites
Source: MDPI journal article supplement (doi:10.3390/nano13010138), 2022-12-27
Supplement: s1 [file s1]

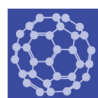

## Supplementary Materials

# Effect of Ambient Plasma Treatments on Thermal Conductivity and Fracture Toughness of Boron Nitride Nanosheets/Epoxy Nanocomposites

Won-Jong Choi, Seul-Yi Lee \* and Soo-Jin Park \*

Department of Chemistry, Inha University, 100 Inharo, Incheon 22212, Republic of Korea

\* Correspondence: sjpark@inha.ac.kr (S.-J.P.); leesy1019@inha.ac.kr (S.-Y.L.); Tel.: +82-32-876-7234 (S.-J.P.)

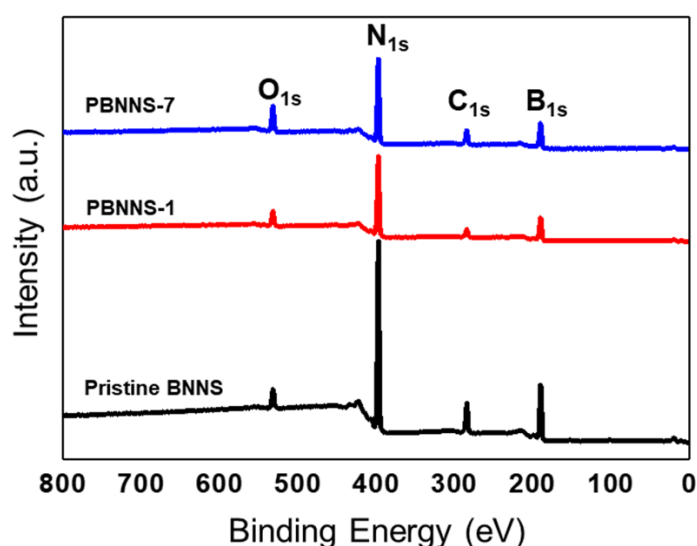**Figure S1.** XPS spectra of pristine BNNS and PBNNs.**Table S1.** XPS results of pristine BNNS and PBNNs.

| Samples   | Atomic (%)      |                 |                 |
|-----------|-----------------|-----------------|-----------------|
|           | B <sub>1s</sub> | N <sub>1s</sub> | O <sub>1s</sub> |
| NEAT      | 54.09           | 42.25           | 3.62            |
| P-BNNS 1  | 53.04           | 43.29           | 3.67            |
| P-BNNS 3  | 53.68           | 42.11           | 4.21            |
| P-BNNS 5  | 53.54           | 40.12           | 6.34            |
| P-BNNS 7  | 53.43           | 38.05           | 8.52            |
| P-BNNS 10 | 53.24           | 38.41           | 8.35            |

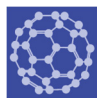**Table S2.** Surface free energy, specific of the test wetting liquids used.

| Wetting liquids | $\gamma_L$ (mJ.m <sup>-2</sup> ) | $\gamma_L^L$ (mJ.m <sup>-2</sup> ) | $\gamma_L^{SP}$ (mJ.m <sup>-2</sup> ) |
|-----------------|----------------------------------|------------------------------------|---------------------------------------|
| Distilled water | 72.80                            | 21.80                              | 0.38                                  |
| Ethylene glycol | 47.70                            | 31.00                              | 16.70                                 |
| Diiodomethane   | 50.80                            | 50.42                              | 51.00                                 |

**Table S3.** The contact angles of PBE nanocomposites.

| Specimens | Contact angle ( $\theta$ ) |                |                 |
|-----------|----------------------------|----------------|-----------------|
|           | Distilled water            | Diiodomethane  | Ethylene glycol |
| Neat      | 88.7 $\pm$ 0.3             | 59.1 $\pm$ 0.9 | 38.1 $\pm$ 0.7  |
| PBE-1     | 84.5 $\pm$ 0.4             | 58.0 $\pm$ 0.4 | 39.5 $\pm$ 0.1  |
| PBE-3     | 80.8 $\pm$ 0.1             | 57.1 $\pm$ 0.9 | 38.3 $\pm$ 0.5  |
| PBE-5     | 75.9 $\pm$ 0.2             | 56.8 $\pm$ 0.9 | 39.8 $\pm$ 0.8  |
| PBE-7     | 70.5 $\pm$ 0.6             | 56.1 $\pm$ 0.6 | 38.0 $\pm$ 0.9  |
| PBE-10    | 85.9 $\pm$ 0.4             | 58.8 $\pm$ 0.1 | 38.2 $\pm$ 0.7  |

**Table S4.** Thermal conductivity parameter of PBE composites.

| Specimens | Temperature<br>°C | Diffusivity<br>(mm <sup>2</sup> .s <sup>-2</sup> ) | C <sub>p</sub><br>(J.gK <sup>-1</sup> ) | Thermal conductivity<br>(W.mK <sup>-1</sup> ) |
|-----------|-------------------|----------------------------------------------------|-----------------------------------------|-----------------------------------------------|
| Neat      | 25                | 0.310                                              | 1.411                                   | 0.372                                         |
| PBE-1     | 25                | 0.313                                              | 1.549                                   | 0.375                                         |
| PBE-3     | 25                | 0.336                                              | 0.870                                   | 0.403                                         |
| PBE-5     | 25                | 0.372                                              | 1.356                                   | 0.446                                         |
| PBE-7     | 25                | 0.446                                              | 1.288                                   | 0.535                                         |
| PBE-10    | 25                | 0.283                                              | 0.868                                   | 0.339                                         |
